# Supplementary material for: Semaphorin 5B mediates synapse elimination in hippocampal neurons
Source: PubMed Central journal article supplement (PMC2696441; doi:10.1186/1749-8104-4-18), 2009-05-23
Supplement: 1749-8104-4-18-S1.pdf [file 1749-8104-4-18-S1.pdf]

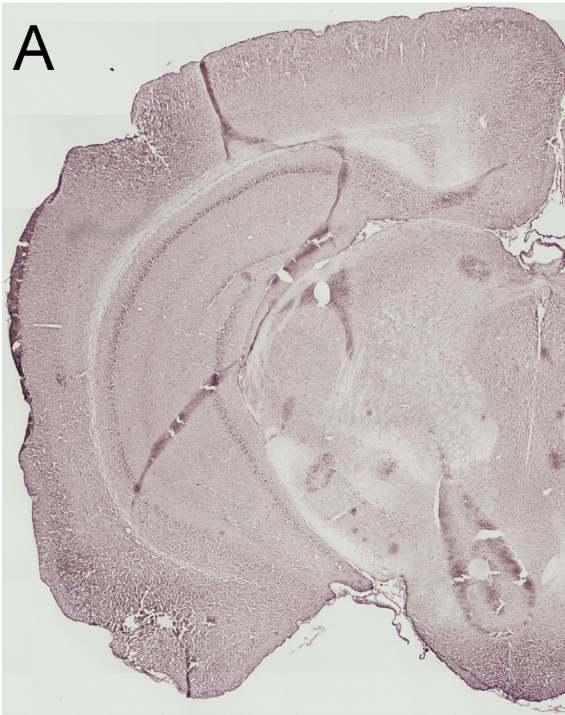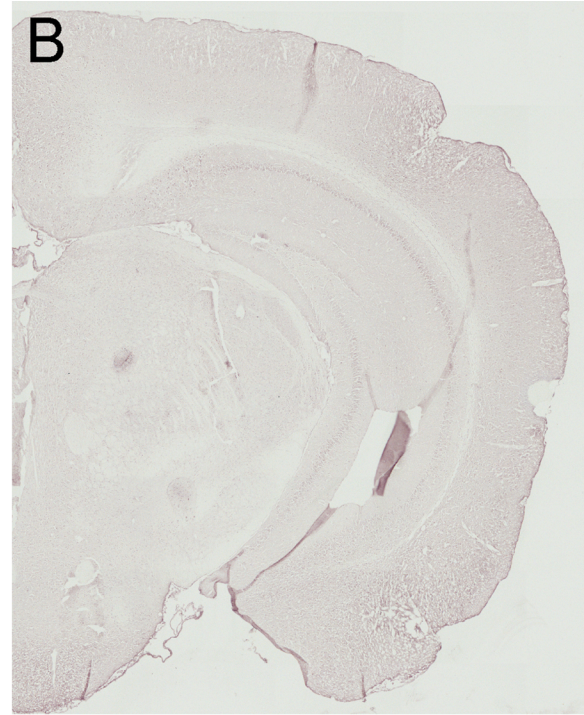

Additional Figure 1
